# Supplementary material for: A 6-Membrane Protein Gene score for prognostic prediction of cytogenetically normal acute myeloid leukemia in multiple cohorts
Source: PubMed Central journal article supplement (PMC6930412; doi:10.7150/jca.35382), 2020-01-01
Supplement: jcav11p0251s1.pdf [file jcav11p0251s1.pdf]

## Supporting Information

Table S1. Prognostic clinical indicators in univariate survival analysis in TCGA dataset.

| Clinical Index  | beta     | HR (95% CI for HR) | wald.test | p.value       |
|-----------------|----------|--------------------|-----------|---------------|
| Sex.            | -0.31    | 0.74 (0.45-1.2)    | 1.5       | 0.23          |
| Age.            | 0.75     | 2.1 (1.3-3.5)      | 8.7       | <b>0.0032</b> |
| WBC.            | 0.24     | 1.3 (0.74-2.2)     | 0.76      | 0.38          |
| BM_Blast.       | -0.0056  | 0.99 (0.98-1)      | 0.66      | 0.42          |
| PML_RARA.       | 0        | 1 (1-1)            | NA        | NA            |
| MLL_partner.    | 0        | 1 (1-1)            | NA        | NA            |
| MYH11_CBFB.     | 0        | 1 (1-1)            | NA        | NA            |
| RUNX1_RUNX1T1.  | 0        | 1 (1-1)            | NA        | NA            |
| MLLT10_partner. | 0        | 1 (1-1)            | NA        | NA            |
| BCR_ABL.        | 0        | 1 (1-1)            | NA        | NA            |
| GPR128_TFG.     | 0        | 1 (1-1)            | NA        | NA            |
| NUP98_NSD1.     | -1.8     | 0.17 (0.038-0.74)  | 5.6       | <b>0.018</b>  |
| MLL_PTD.        | 0.48     | 1.6 (0.76-3.4)     | 1.6       | 0.21          |
| FLT3.           | -0.46    | 0.63 (0.38-1.1)    | 3.1       | <b>0.078</b>  |
| NPM1.           | 0.15     | 1.2 (0.71-1.9)     | 0.37      | 0.54          |
| DNMT3A.         | -0.44    | 0.64 (0.39-1.1)    | 2.8       | <b>0.093</b>  |
| IDH2.           | -0.39    | 0.68 (0.34-1.3)    | 1.2       | 0.27          |
| IDH1.           | 1.2      | 3.2 (1.2-8.9)      | 5         | <b>0.026</b>  |
| RUNX1.          | -0.58    | 0.56 (0.28-1.1)    | 2.8       | <b>0.097</b>  |
| TET2.           | 0.45     | 1.6 (0.75-3.3)     | 1.4       | 0.23          |
| TP53.           | -0.95    | 0.39 (0.052-2.9)   | 0.87      | 0.35          |
| NRAS.           | 0.9      | 2.4 (0.77-7.8)     | 2.3       | 0.13          |
| CEBPA.          | 0.14     | 1.2 (0.5-2.7)      | 0.11      | 0.74          |
| WT1.            | -0.1     | 0.9 (0.36-2.3)     | 0.05      | 0.83          |
| PTPN11.         | -0.21    | 0.81 (0.33-2)      | 0.2       | 0.66          |
| KIT.            | 0        | 1 (1-1)            | NA        | NA            |
| KRAS.           | 0.032    | 1 (0.25-4.2)       | 0         | 0.96          |
| MT_CO2.         | -1.1     | 0.34 (0.081-1.4)   | 2.2       | 0.14          |
| TTN.            | -0.78    | 0.46 (0.19-1.1)    | 3.2       | 0.073         |
| U2AF1.          | 17       | 2.6e+07 (0-Inf)    | 0         | 1             |
| SMC1A.          | -0.7     | 0.5 (0.18-1.4)     | 1.8       | 0.18          |
| SMC3.           | -0.74    | 0.48 (0.17-1.3)    | 2         | 0.16          |
| STAG2.          | 0.16     | 1.2 (0.42-3.2)     | 0.09      | 0.76          |
| MT_CYB.         | -1.4     | 0.24 (0.072-0.81)  | 5.3       | <b>0.022</b>  |
| PHF6.           | -0.18    | 0.84 (0.26-2.7)    | 0.09      | 0.77          |
| FAB             | NA       | NA                 | 5.02      | 0.54          |
| FAB.M1          | -0.84353 | 0.43 (0.14-1.3)    | NA        | 0.140695      |
| FAB.M2          | -0.61088 | 0.54 (0.18-1.7)    | NA        | 0.284304      |
| FAB.M3          | NA       | NA                 | NA        | NA            |
| FAB.M4          | -0.25097 | 0.78 (0.26-2.3)    | NA        | 0.654013      |

|        |          |                 |    |          |
|--------|----------|-----------------|----|----------|
| FAB.M5 | -0.80282 | 0.45 (0.13-1.6) | NA | 0.211716 |
| FAB.M6 | NA       | NA              | NA | NA       |
| FAB.M7 | 0.408307 | 1.5 (0.17-14)   | NA | 0.716368 |

Table S2. 203 genes independent of the eight clinical indicators in the TCGA CN-AML cohort (P<0.05).

| Gene       | beta  | HR (95% CI for HR) | p.value |
|------------|-------|--------------------|---------|
| FAM64A     | -1.1  | 0.32 (0.14-0.77)   | 0.01    |
| KBTBD11    | -1.1  | 0.34 (0.18-0.67)   | 0.0015  |
| FBXO25     | -1    | 0.35 (0.18-0.68)   | 0.002   |
| ASCL2      | -1    | 0.36 (0.19-0.66)   | 0.001   |
| PCK2       | -1    | 0.36 (0.2-0.64)    | 0.00054 |
| CDCA5      | -0.99 | 0.37 (0.2-0.67)    | 0.0011  |
| AKAP2      | -0.96 | 0.38 (0.17-0.88)   | 0.023   |
| PALM2      | -0.96 | 0.38 (0.17-0.88)   | 0.023   |
| CRIM1      | -0.93 | 0.4 (0.2-0.79)     | 0.0081  |
| CPD        | -0.88 | 0.41 (0.21-0.82)   | 0.011   |
| FOXN3      | -0.89 | 0.41 (0.21-0.82)   | 0.011   |
| BEND3      | -0.9  | 0.41 (0.22-0.76)   | 0.0045  |
| LOC643837  | -0.89 | 0.41 (0.22-0.76)   | 0.0045  |
| APOD       | -0.86 | 0.42 (0.22-0.83)   | 0.012   |
| HES6       | -0.87 | 0.42 (0.23-0.78)   | 0.0061  |
| CDT1       | -0.85 | 0.43 (0.23-0.79)   | 0.0071  |
| CBX2       | -0.84 | 0.43 (0.23-0.8)    | 0.0076  |
| NNMT       | -0.85 | 0.43 (0.24-0.78)   | 0.0051  |
| ERAP2      | -0.82 | 0.44 (0.25-0.77)   | 0.0042  |
| LUM        | -0.81 | 0.44 (0.25-0.79)   | 0.006   |
| FLI1       | -0.81 | 0.45 (0.24-0.82)   | 0.0094  |
| CYL7       | -0.8  | 0.45 (0.24-0.86)   | 0.015   |
| CATSPER2P1 | -0.81 | 0.45 (0.25-0.8)    | 0.0073  |
| MTMR6      | -0.79 | 0.45 (0.25-0.81)   | 0.008   |
| CERK       | -0.78 | 0.46 (0.22-0.96)   | 0.039   |
| APOE       | -0.78 | 0.46 (0.24-0.87)   | 0.017   |
| ZNF491     | -0.77 | 0.46 (0.26-0.81)   | 0.0068  |
| FGD5       | -0.75 | 0.47 (0.24-0.94)   | 0.034   |
| TK1        | -0.76 | 0.47 (0.26-0.83)   | 0.0093  |
| DDIT4L     | -0.75 | 0.47 (0.26-0.88)   | 0.018   |
| P2RY8      | -0.75 | 0.47 (0.27-0.84)   | 0.01    |
| M6PR       | -0.75 | 0.47 (0.28-0.81)   | 0.0066  |
| CCL14      | -0.74 | 0.48 (0.24-0.93)   | 0.03    |
| IGFBP3     | -0.74 | 0.48 (0.25-0.91)   | 0.024   |
| LBR        | -0.74 | 0.48 (0.25-0.92)   | 0.027   |
| TROAP      | -0.73 | 0.48 (0.26-0.88)   | 0.019   |

|           |       |                  |       |
|-----------|-------|------------------|-------|
| HIST1H3B  | -0.74 | 0.48 (0.27-0.86) | 0.014 |
| CXCL12    | -0.71 | 0.49 (0.26-0.92) | 0.026 |
| BGN       | -0.72 | 0.49 (0.26-0.92) | 0.027 |
| MCM7      | -0.72 | 0.49 (0.26-0.92) | 0.027 |
| DCN       | -0.71 | 0.49 (0.27-0.92) | 0.025 |
| COL1A2    | -0.69 | 0.5 (0.27-0.93)  | 0.028 |
| CEBPA     | -0.68 | 0.51 (0.27-0.95) | 0.034 |
| FSTL1     | -0.67 | 0.51 (0.27-0.97) | 0.041 |
| DPY19L2   | -0.68 | 0.51 (0.28-0.9)  | 0.021 |
| MGP       | -0.67 | 0.51 (0.28-0.96) | 0.036 |
| SLC24A3   | -0.65 | 0.52 (0.28-0.96) | 0.035 |
| COL3A1    | -0.65 | 0.52 (0.28-0.97) | 0.04  |
| PATZ1     | -0.66 | 0.52 (0.29-0.93) | 0.028 |
| B4GALT7   | -0.65 | 0.52 (0.29-0.96) | 0.037 |
| GFM2      | -0.63 | 0.53 (0.29-0.97) | 0.039 |
| E2F1      | -0.64 | 0.53 (0.29-0.97) | 0.04  |
| GPR153    | -0.64 | 0.53 (0.29-0.97) | 0.041 |
| GPR125    | -0.63 | 0.53 (0.29-0.99) | 0.048 |
| TGIF1     | -0.63 | 0.53 (0.3-0.94)  | 0.028 |
| RHOBTB3   | -0.62 | 0.54 (0.29-0.98) | 0.044 |
| BIRC5     | -0.62 | 0.54 (0.3-0.96)  | 0.037 |
| EPR1      | -0.62 | 0.54 (0.3-0.96)  | 0.037 |
| FAM178B   | -0.61 | 0.54 (0.3-0.97)  | 0.038 |
| ZC3H4     | -0.61 | 0.54 (0.3-0.97)  | 0.038 |
| RNF26     | -0.61 | 0.54 (0.3-0.97)  | 0.041 |
| FOXM1     | -0.61 | 0.54 (0.3-0.99)  | 0.046 |
| FOXK1     | -0.62 | 0.54 (0.31-0.92) | 0.025 |
| GTSE1     | -0.61 | 0.54 (0.31-0.96) | 0.036 |
| ORC1      | -0.6  | 0.55 (0.31-0.97) | 0.038 |
| FLT4      | -0.6  | 0.55 (0.31-0.97) | 0.04  |
| HIST2H2AC | -0.59 | 0.55 (0.31-1)    | 0.05  |
| BRD3      | -0.59 | 0.56 (0.32-0.97) | 0.04  |
| MBTPS1    | -0.58 | 0.56 (0.32-0.98) | 0.041 |
| CP110     | -0.57 | 0.56 (0.32-0.99) | 0.047 |
| SPC24     | -0.58 | 0.56 (0.32-0.99) | 0.047 |
| NCAPH     | -0.57 | 0.56 (0.33-0.97) | 0.04  |
| EIF4EBP2  | -0.57 | 0.57 (0.33-0.98) | 0.04  |
| RFESD     | -0.56 | 0.57 (0.33-0.99) | 0.048 |
| RETN      | 0.55  | 1.7 (1-3)        | 0.045 |
| SNORA76   | 0.56  | 1.7 (1-3)        | 0.046 |
| ACSF2     | 0.59  | 1.8 (1.1-3.1)    | 0.032 |
| PRKRIP1   | 0.59  | 1.8 (1.1-3.1)    | 0.032 |
| ZRSR2     | 0.61  | 1.8 (1.1-3.2)    | 0.027 |
| MRPS18C   | 0.61  | 1.8 (1.1-3.2)    | 0.028 |

|           |      |               |       |
|-----------|------|---------------|-------|
| NUDT8     | 0.58 | 1.8 (1-3)     | 0.033 |
| ARHGAP27  | 0.59 | 1.8 (1-3.1)   | 0.035 |
| AMPH      | 0.58 | 1.8 (1-3.1)   | 0.038 |
| FLJ45244  | 0.59 | 1.8 (1-3.1)   | 0.04  |
| HTR7      | 0.57 | 1.8 (1-3.1)   | 0.046 |
| PDK2      | 0.57 | 1.8 (1-3.1)   | 0.046 |
| MLANA     | 0.57 | 1.8 (1-3.1)   | 0.05  |
| HRH2      | 0.6  | 1.8 (1-3.2)   | 0.033 |
| STAB1     | 0.6  | 1.8 (1-3.2)   | 0.038 |
| TXNDC6    | 0.6  | 1.8 (1-3.2)   | 0.038 |
| KIAA0125  | 0.59 | 1.8 (1-3.2)   | 0.045 |
| NUDT17    | 0.61 | 1.8 (1-3.3)   | 0.039 |
| TSPAN2    | 0.61 | 1.8 (1-3.3)   | 0.041 |
| PLEKHB1   | 0.61 | 1.8 (1-3.4)   | 0.05  |
| CSF1R     | 0.64 | 1.9 (1.1-3.2) | 0.015 |
| TFPT      | 0.64 | 1.9 (1.1-3.2) | 0.019 |
| C2orf24   | 0.63 | 1.9 (1.1-3.2) | 0.021 |
| DUSP3     | 0.63 | 1.9 (1.1-3.2) | 0.022 |
| AMICA1    | 0.62 | 1.9 (1.1-3.2) | 0.025 |
| ISCU      | 0.62 | 1.9 (1.1-3.2) | 0.027 |
| VIM       | 0.66 | 1.9 (1.1-3.3) | 0.017 |
| BAIAP3    | 0.64 | 1.9 (1.1-3.3) | 0.026 |
| LARP7     | 0.64 | 1.9 (1.1-3.3) | 0.026 |
| ABLIM1    | 0.63 | 1.9 (1.1-3.3) | 0.032 |
| XPR1      | 0.63 | 1.9 (1.1-3.3) | 0.032 |
| SLC7A6OS  | 0.64 | 1.9 (1.1-3.4) | 0.033 |
| IL32      | 0.66 | 1.9 (1.1-3.5) | 0.031 |
| DNAJB2    | 0.62 | 1.9 (1-3.3)   | 0.034 |
| GABBR1    | 0.63 | 1.9 (1-3.4)   | 0.042 |
| SOCS2     | 0.63 | 1.9 (1-3.4)   | 0.043 |
| C17orf108 | 0.62 | 1.9 (1-3.4)   | 0.047 |
| IL2RA     | 0.64 | 1.9 (1-3.5)   | 0.039 |
| NCALD     | 0.63 | 1.9 (1-3.5)   | 0.04  |
| CCT6B     | 0.64 | 1.9 (1-3.5)   | 0.044 |
| PTH2R     | 0.65 | 1.9 (1-3.6)   | 0.04  |
| TPPP3     | 0.67 | 2 (1.1-3.4)   | 0.017 |
| TNFRSF25  | 0.67 | 2 (1.1-3.4)   | 0.018 |
| PXN       | 0.69 | 2 (1.1-3.5)   | 0.015 |
| ABCC2     | 0.7  | 2 (1.1-3.5)   | 0.016 |
| TRIM71    | 0.69 | 2 (1.1-3.5)   | 0.016 |
| CMKLR1    | 0.69 | 2 (1.1-3.5)   | 0.02  |
| KMO       | 0.68 | 2 (1.1-3.5)   | 0.02  |
| CCDC137   | 0.68 | 2 (1.1-3.5)   | 0.023 |
| FAM118B   | 0.7  | 2 (1.1-3.6)   | 0.015 |

|          |      |               |        |
|----------|------|---------------|--------|
| PDLIM7   | 0.71 | 2 (1.1-3.6)   | 0.017  |
| GEMIN7   | 0.69 | 2 (1.1-3.6)   | 0.025  |
| ATP13A2  | 0.71 | 2 (1.1-3.7)   | 0.018  |
| STARD4   | 0.71 | 2 (1.1-3.7)   | 0.021  |
| FAM63B   | 0.7  | 2 (1.1-3.7)   | 0.025  |
| LTB      | 0.7  | 2 (1.1-3.7)   | 0.026  |
| CD33     | 0.7  | 2 (1.1-3.8)   | 0.027  |
| TPT1     | 0.71 | 2 (1.2-3.5)   | 0.011  |
| PDLIM1   | 0.68 | 2 (1-3.7)     | 0.037  |
| RDH13    | 0.67 | 2 (1-3.7)     | 0.043  |
| CD1C     | 0.69 | 2 (1-3.8)     | 0.036  |
| PIK3R6   | 0.67 | 2 (1-3.8)     | 0.045  |
| SAMD3    | 0.67 | 2 (1-3.8)     | 0.047  |
| CD1E     | 0.67 | 2 (1-3.8)     | 0.049  |
| EOMES    | 0.7  | 2 (1-3.9)     | 0.04   |
| SPAG1    | 0.7  | 2 (1-3.9)     | 0.043  |
| EPSTI1   | 0.72 | 2 (1-4)       | 0.036  |
| C1orf124 | 0.73 | 2.1 (1.1-3.8) | 0.017  |
| DAAM1    | 0.74 | 2.1 (1.1-3.9) | 0.02   |
| ELN      | 0.74 | 2.1 (1.1-3.9) | 0.02   |
| LRRK1    | 0.75 | 2.1 (1.1-4)   | 0.02   |
| CD2      | 0.74 | 2.1 (1.1-4)   | 0.023  |
| ECE1     | 0.73 | 2.1 (1.1-4.1) | 0.035  |
| ME1      | 0.72 | 2.1 (1.2-3.5) | 0.0086 |
| DGKA     | 0.73 | 2.1 (1.2-3.6) | 0.0098 |
| CEP164   | 0.75 | 2.1 (1.2-3.7) | 0.0085 |
| PRSS2    | 0.73 | 2.1 (1.2-3.7) | 0.014  |
| ZNF133   | 0.73 | 2.1 (1.2-3.7) | 0.015  |
| C1orf56  | 0.75 | 2.1 (1.2-3.8) | 0.0094 |
| PLCD3    | 0.76 | 2.1 (1.2-3.8) | 0.0094 |
| ADK      | 0.75 | 2.1 (1.2-3.8) | 0.013  |
| CCDC75   | 0.74 | 2.1 (1.2-3.8) | 0.013  |
| IL17RC   | 0.76 | 2.1 (1-4.4)   | 0.04   |
| RASGEF1A | 0.77 | 2.2 (1.1-4)   | 0.018  |
| BAI1     | 0.77 | 2.2 (1.1-4.3) | 0.028  |
| FOXO1    | 0.78 | 2.2 (1.1-4.5) | 0.035  |
| LRG1     | 0.8  | 2.2 (1.1-4.7) | 0.034  |
| PRMT2    | 0.77 | 2.2 (1.2-3.8) | 0.0071 |
| IL1RAP   | 0.77 | 2.2 (1.2-3.8) | 0.0079 |
| TNFRSF18 | 0.78 | 2.2 (1.2-3.9) | 0.0091 |
| CD7      | 0.8  | 2.2 (1.2-4)   | 0.0077 |
| SOCS1    | 0.79 | 2.2 (1.2-4)   | 0.0087 |
| PHLDB3   | 0.79 | 2.2 (1.2-4)   | 0.0095 |
| EMP1     | 0.79 | 2.2 (1.2-4.1) | 0.013  |

|            |      |               |         |
|------------|------|---------------|---------|
| AADAT      | 0.81 | 2.2 (1.3-4)   | 0.0056  |
| TLR9       | 0.8  | 2.2 (1.3-4)   | 0.0066  |
| HSD17B7    | 0.84 | 2.3 (1.1-4.8) | 0.025   |
| ROBO4      | 0.82 | 2.3 (1.2-4.3) | 0.013   |
| RNF144B    | 0.81 | 2.3 (1.3-4)   | 0.0045  |
| CPA6       | 0.85 | 2.3 (1.4-4.1) | 0.0024  |
| PLEKHA6    | 0.87 | 2.4 (1.2-4.6) | 0.0086  |
| CD52       | 0.88 | 2.4 (1.2-4.8) | 0.013   |
| CLIC3      | 0.87 | 2.4 (1.3-4.2) | 0.003   |
| HAT1       | 0.87 | 2.4 (1.3-4.2) | 0.0031  |
| LOC729156  | 0.87 | 2.4 (1.3-4.2) | 0.0032  |
| SNORD42A   | 0.87 | 2.4 (1.3-4.2) | 0.0035  |
| LCN6       | 0.89 | 2.4 (1.3-4.4) | 0.0036  |
| NCRNA00241 | 0.87 | 2.4 (1.3-4.4) | 0.0058  |
| HEXIM1     | 0.86 | 2.4 (1.3-4.4) | 0.0066  |
| GOLGA8B    | 0.88 | 2.4 (1.3-4.5) | 0.0052  |
| AGPAT4     | 0.89 | 2.4 (1.3-4.6) | 0.0061  |
| ETS2       | 0.87 | 2.4 (1.4-4.2) | 0.0021  |
| USE1       | 0.88 | 2.4 (1.4-4.2) | 0.0022  |
| PRDM16     | 0.92 | 2.5 (1.2-5.1) | 0.012   |
| CD96       | 0.91 | 2.5 (1.2-5.2) | 0.016   |
| AHNAK2     | 0.93 | 2.5 (1.2-5.5) | 0.017   |
| SNORA48    | 0.92 | 2.5 (1.4-4.4) | 0.0011  |
| XPC        | 0.92 | 2.5 (1.4-4.5) | 0.0019  |
| MREG       | 0.9  | 2.5 (1-5.9)   | 0.042   |
| ADAMTS10   | 0.94 | 2.6 (1.3-5.2) | 0.0085  |
| WFDC1      | 0.94 | 2.6 (1.4-4.8) | 0.0034  |
| IL3RA      | 0.95 | 2.6 (1.5-4.5) | 0.001   |
| SMAGP      | 0.98 | 2.7 (1.4-5.1) | 0.0028  |
| FGFBP2     | 0.98 | 2.7 (1.5-4.9) | 0.0015  |
| PTPRM      | 1.1  | 2.9 (1.5-5.6) | 0.0021  |
| SUSD3      | 1.1  | 3.1 (1.5-6.3) | 0.0019  |
| UTP6       | 1.2  | 3.2 (1.4-7.1) | 0.0046  |
| CYP2C8     | 1.2  | 3.4 (1.8-6.5) | 0.00026 |
| TREML2     | 1.3  | 3.6 (1.9-6.9) | 0.00012 |

---

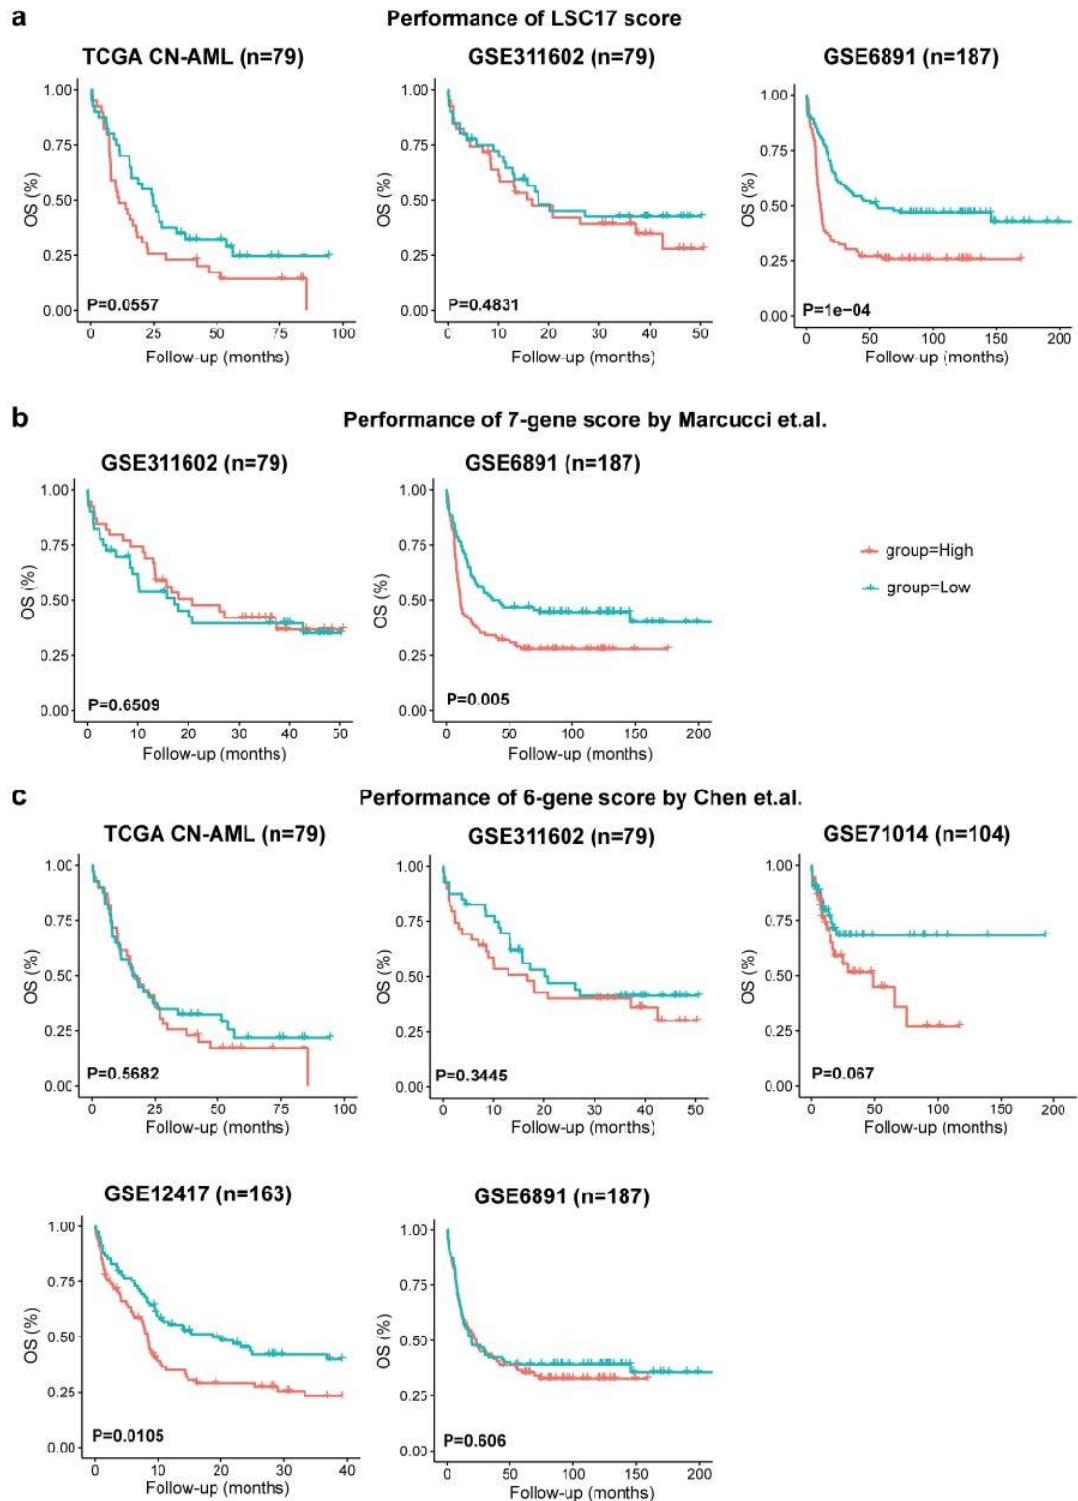

Fig. S1 Performance of other scoring models in CN-AML cohorts

a. Kaplan–Meier estimates of OS using median threshold of LSC17 score in three datasets with expression of genes in LSC17 score available.

b. Kaplan–Meier estimates of OS using median threshold of 7-gene score by Marcucci et.al. in two datasets with expression of genes in the scoring model available.

c. Kaplan–Meier estimates of OS using median threshold of 6-gene score by Chen et.al. in five datasets with expression of genes in the scoring model available.
